# Supplementary material
Source: PubMed Central journal article supplement (PMC1860479)
Supplement: jclinpath_jcp.2005.035212_1.pdf [file jclinpath_jcp.2005.035212_1.pdf]

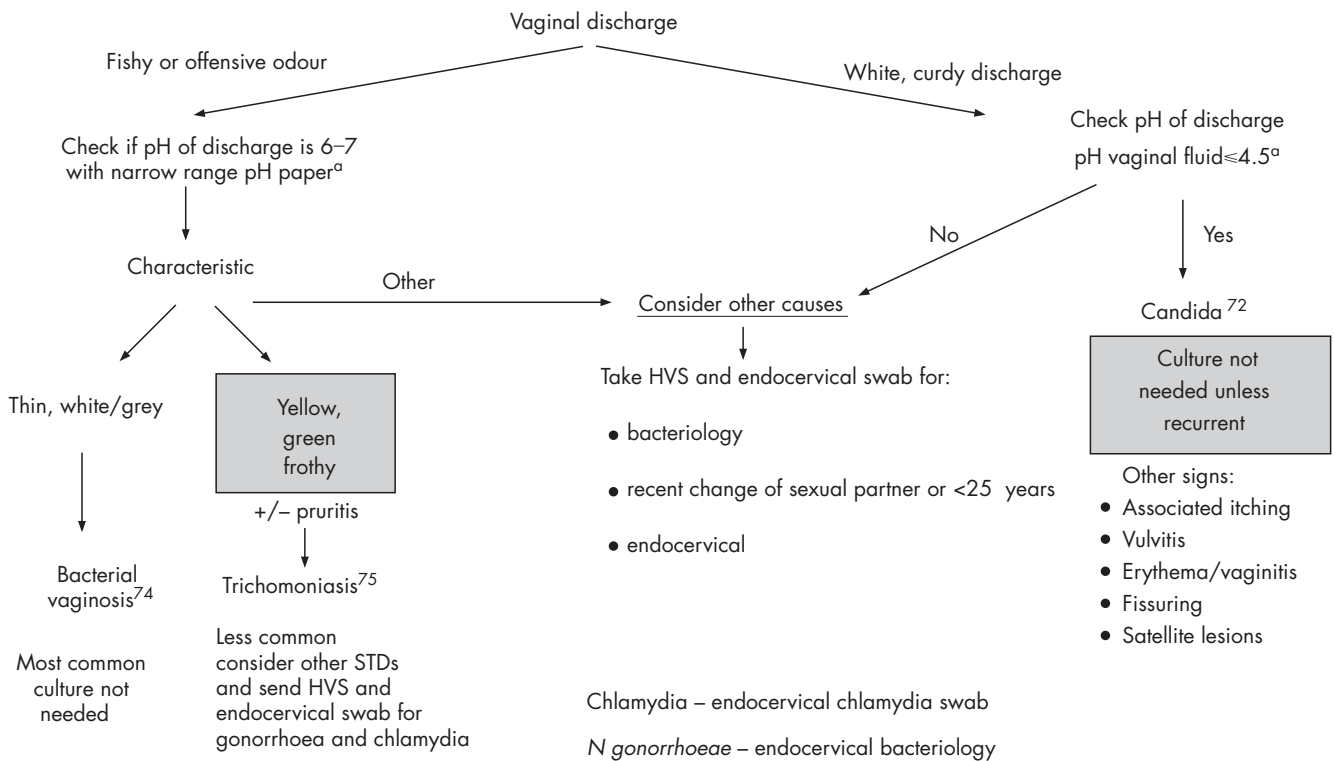

**Figure 1** Diagnosis of candida and bacterial vaginosis by symptoms and signs. STDs, sexually transmitted diseases (a Whatman indicator papers pH 4.0–7.0 narrow range. 7 mm × 5 m dispenser cat. no. 2600-102A. Available on special order from VWR International (Merck) 0800 22 33 44 £7.98+VAT per reel cat. no. 0080079-91. Whatman website <http://www.whatman.plc.uk>).
